# Supplementary material for: Resin glycosides in aerial parts of Ipomoea batatas are potent lipase inhibitors: potential upcycling of sweet potato by-products to combat obesity
Source: Royal Society of Chemistry journal article supplement (doi:10.1039/d2fo00555g), 2022-01-01
Supplement: d2fo00555g1.pdf [file d2fo00555g1.pdf]

## SUPPORTING INFORMATION

# **Resin glycosides in aerial parts of *Ipomoea batatas* are potent lipase inhibitors: potential upcycling of sweet potato by-products to combat obesity**

Joanne Yi Hui Toy <sup>a</sup>, Zhixuan Song <sup>a</sup>, Dejian Huang <sup>a, b, \*</sup>

<sup>a</sup>*Department of Food Science & Technology, National University of Singapore, 2 Science Drive 2, Singapore 117542, Singapore*

<sup>b</sup>*National University of Singapore (Suzhou) Research Institute, 377 Lin Quan Street, Suzhou Industrial Park, Suzhou, Jiangsu 215123, PR China*

*\* Corresponding author:*

Email: [dejian@nus.edu.sg](mailto:dejian@nus.edu.sg)

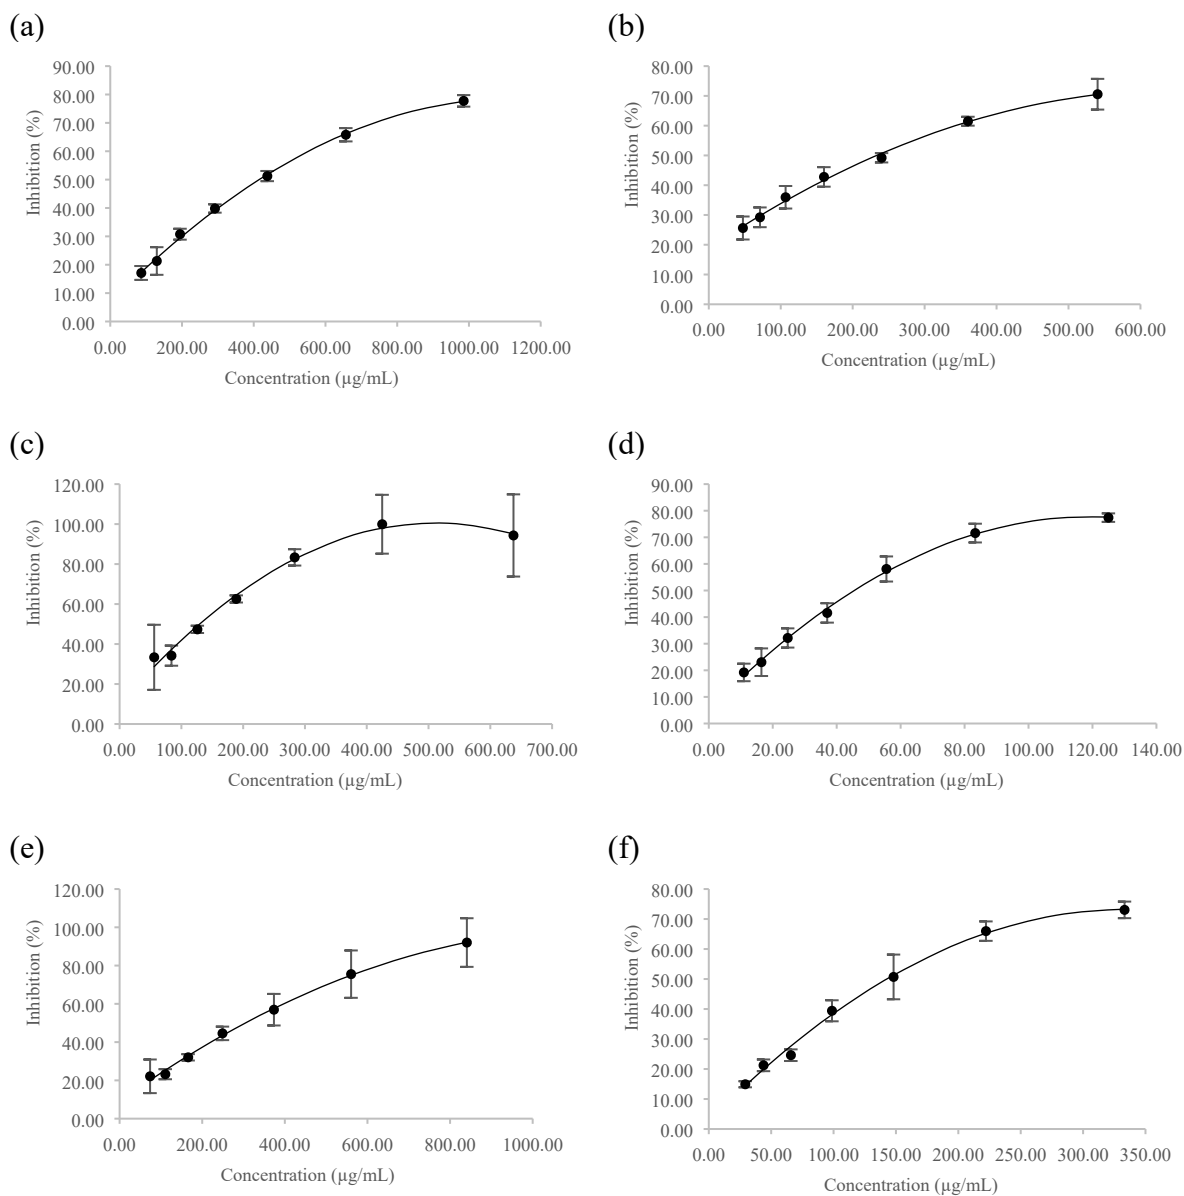

**Figure S1:** Dose-response curve of pancreatic lipase inhibition against concentration of extract (a) Blackie (DCM), (b) Blackie (MeOH), (c) Margarita (DCM), (d) Margarita (MeOH), (e) Blackheart (DCM), (f) Blackheart (MeOH).

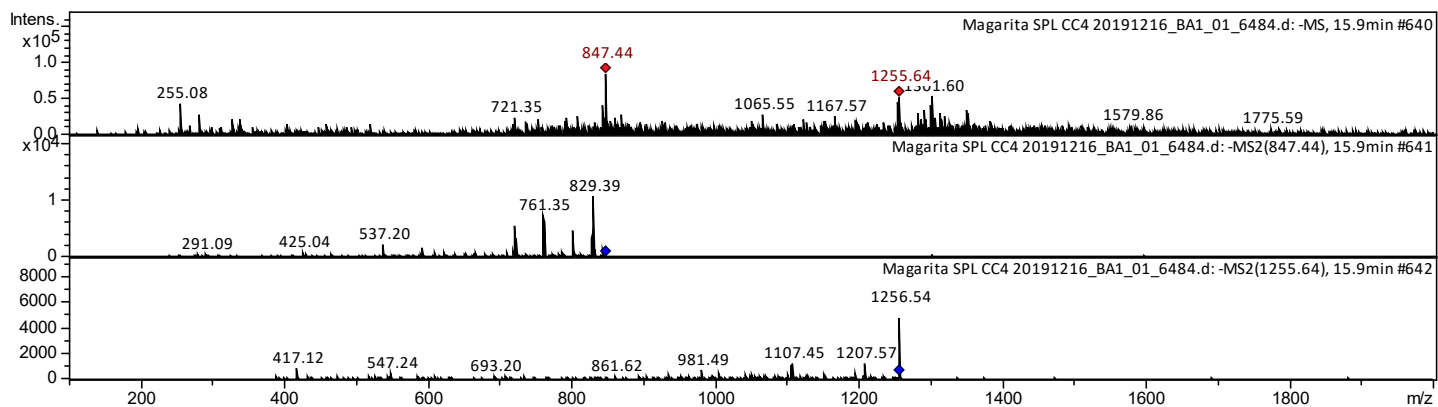

**Figure S2:** LC-ESI-MS/MS of resin glycoside  $m/z$  1255  $[M-H]^-$  from CC4 at 15.9 min.

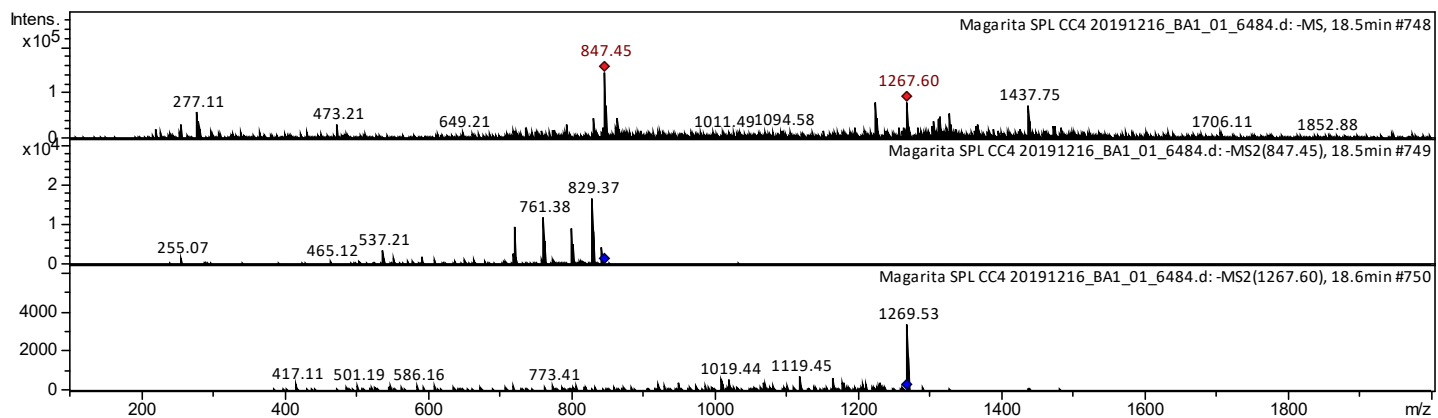

**Figure S3:** LC-ESI-MS/MS of resin glycoside  $m/z$  1267  $[M-H]^-$  from CC4 at 18.6 min.

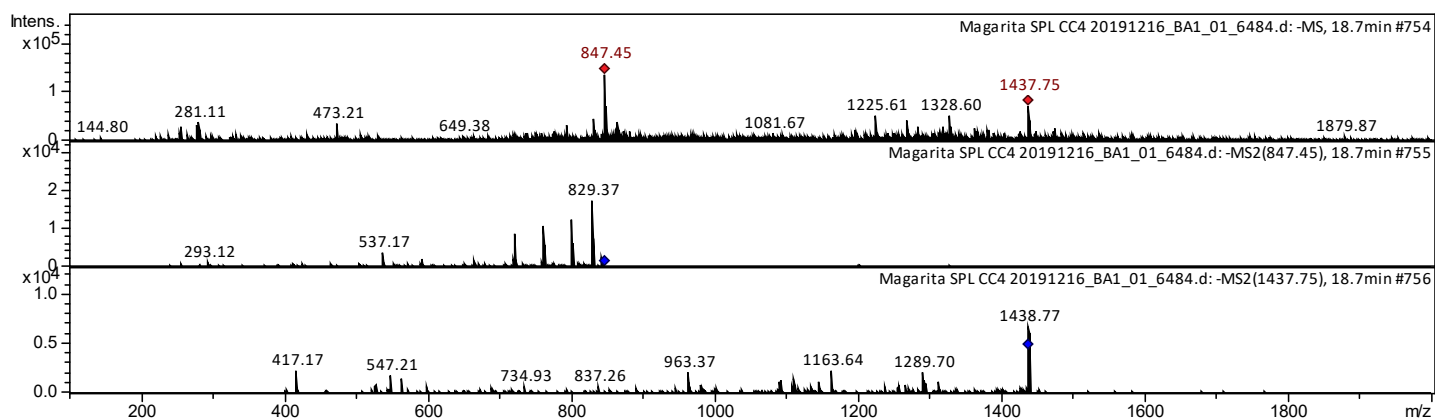

**Figure S4:** LC-ESI-MS/MS of resin glycoside  $m/z$  1437  $[M-H]^-$  from CC4 at 18.7 min.

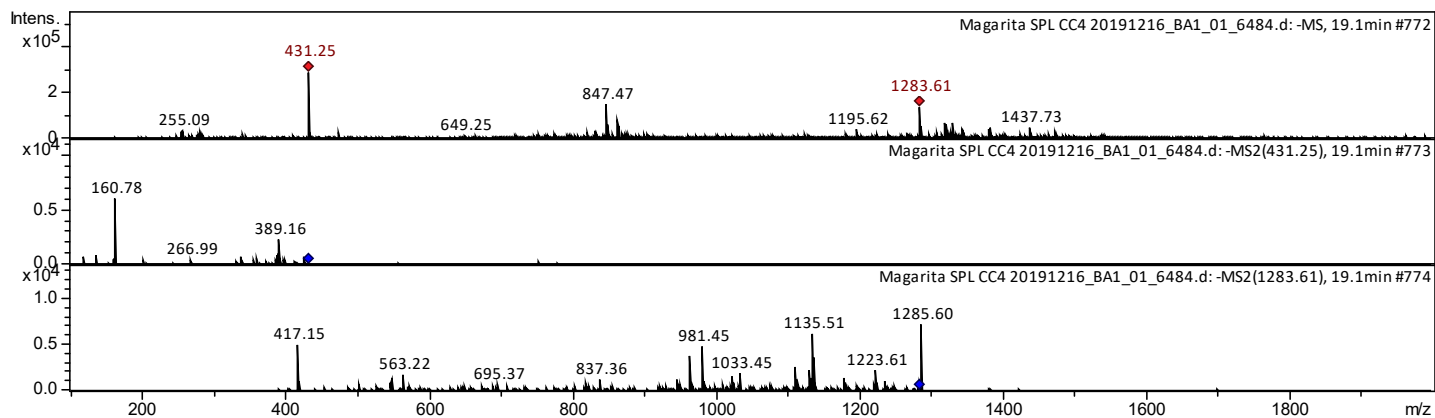

**Figure S5:** LC-ESI-MS/MS of resin glycoside  $m/z$  1283  $[M-H]^-$  from CC4 at 19.1 min.

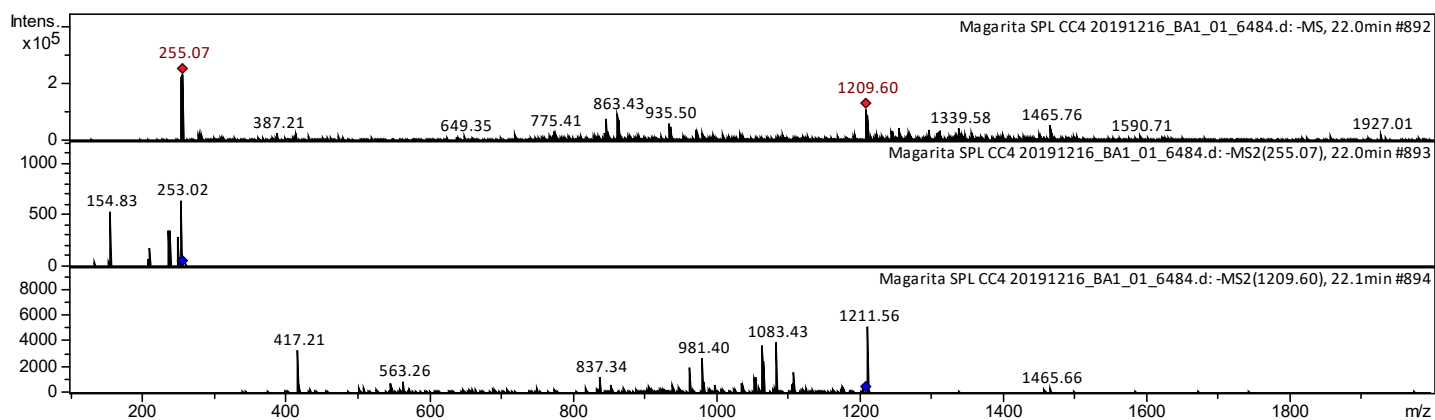

**Figure S6:** LC-ESI-MS/MS of resin glycoside  $m/z$  1209  $[M-H]^-$  from CC4 at 22.1 min.

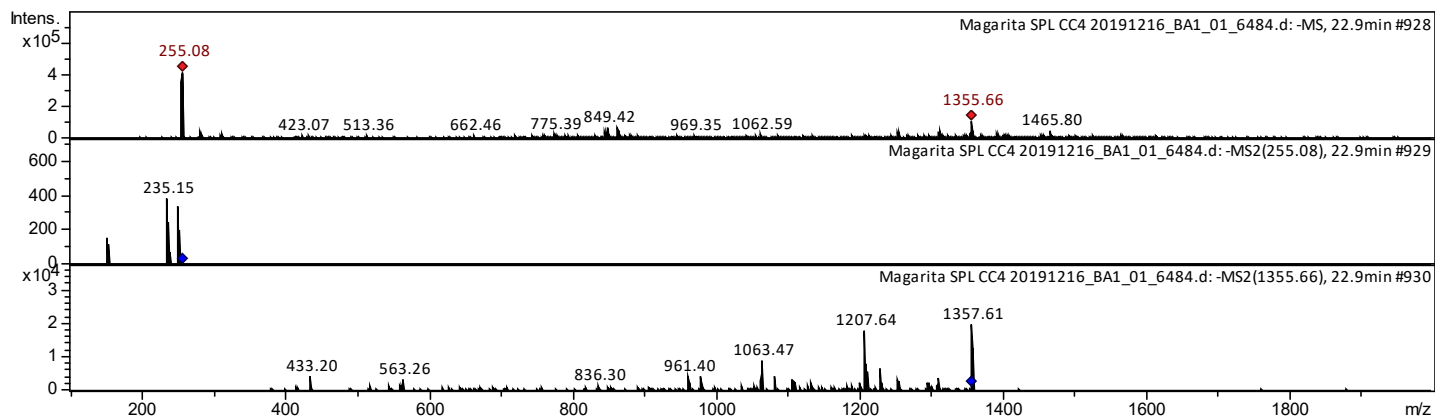

**Figure S7:** LC-ESI-MS/MS of resin glycoside  $m/z$  1355  $[M-H]^-$  from CC4 at 22.9 min.

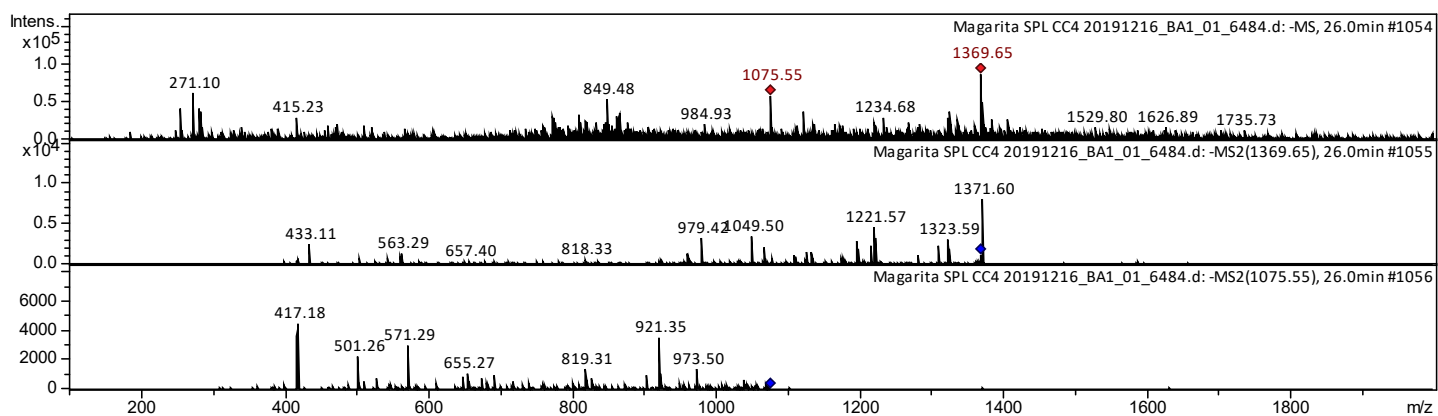

**Figure S8:** LC-ESI-MS/MS of resin glycoside  $m/z$  1369  $[M-H]^-$  from CC4 at 26.0 min.

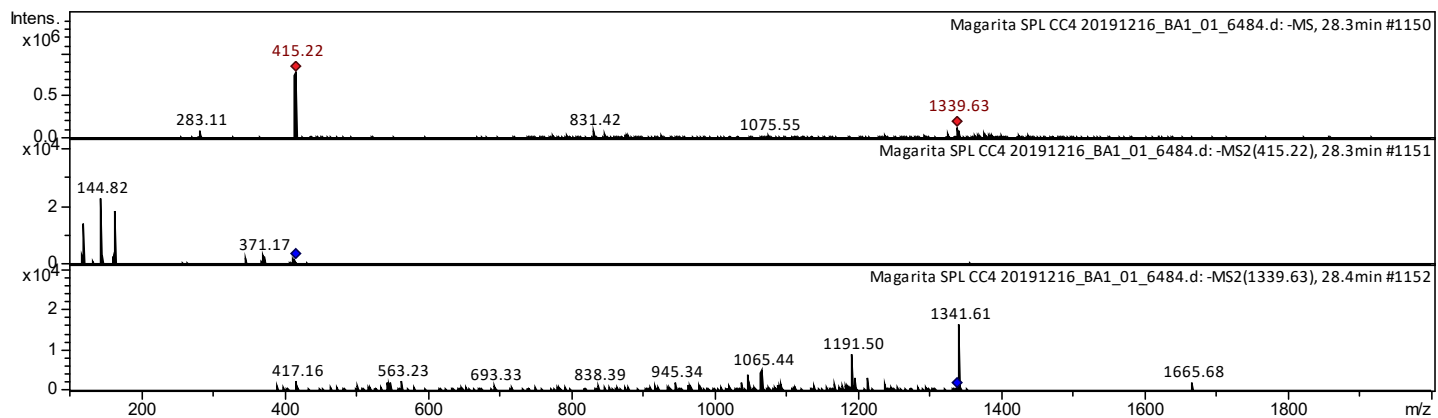

**Figure S9:** LC-ESI-MS/MS of resin glycoside  $m/z$  1339  $[M-H]^-$  from CC4 at 28.4 min.

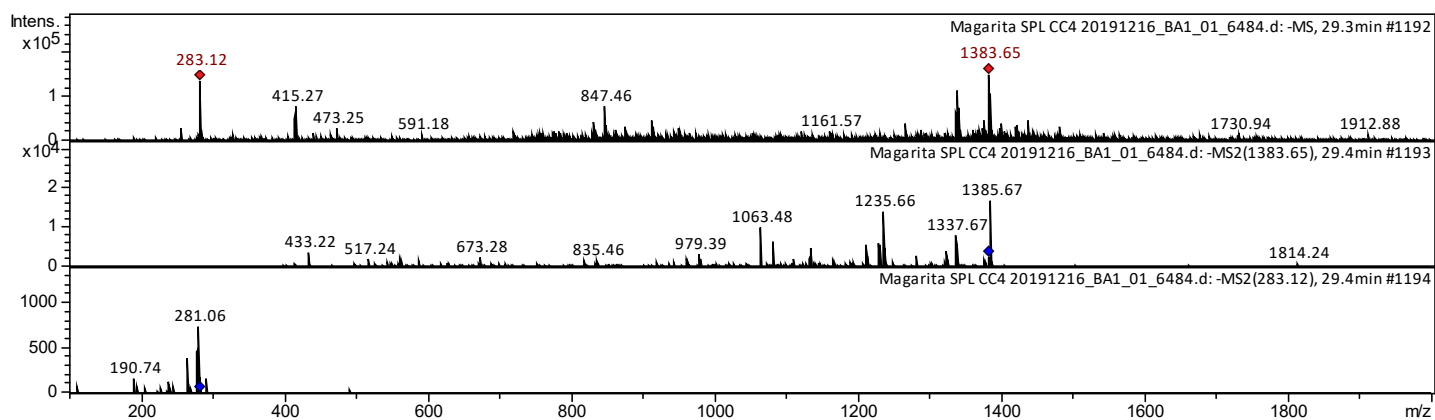

**Figure S10:** LC-ESI-MS/MS of resin glycoside  $m/z$  1383  $[M-H]^-$  from CC4 at 29.4 min.

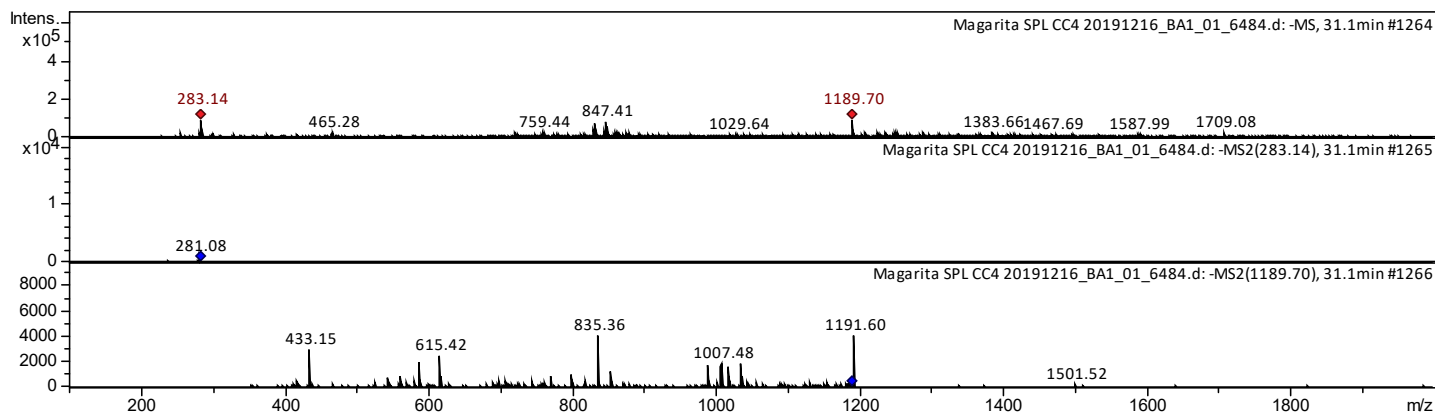

**Figure S11:** LC-ESI-MS/MS of resin glycoside  $m/z$  1189  $[M-H]^-$  from CC4 at 31.1 min.

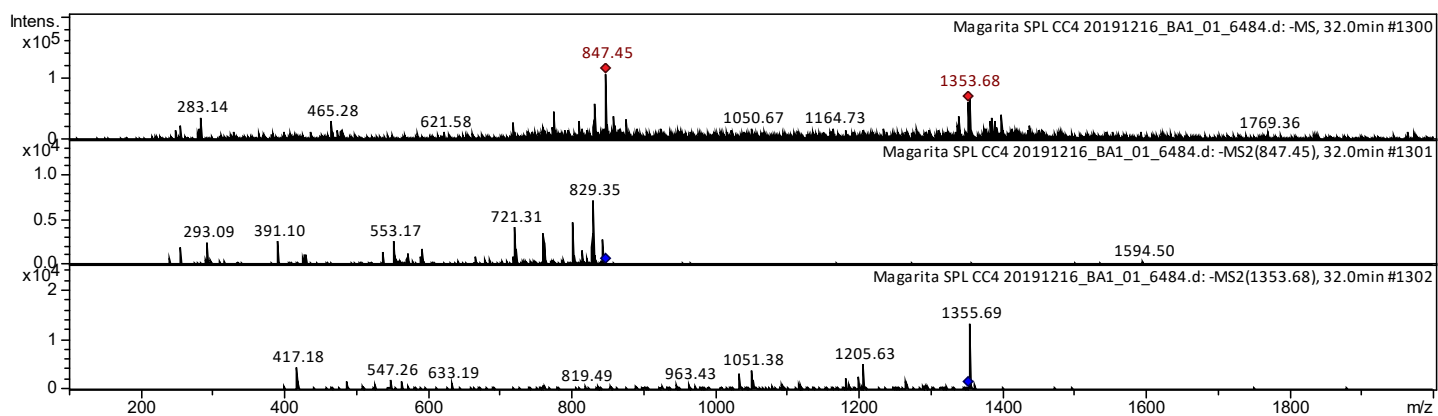

**Figure S12:** LC-ESI-MS/MS of resin glycoside  $m/z$  1353  $[M-H]^-$  from CC4 at 32.0 min.

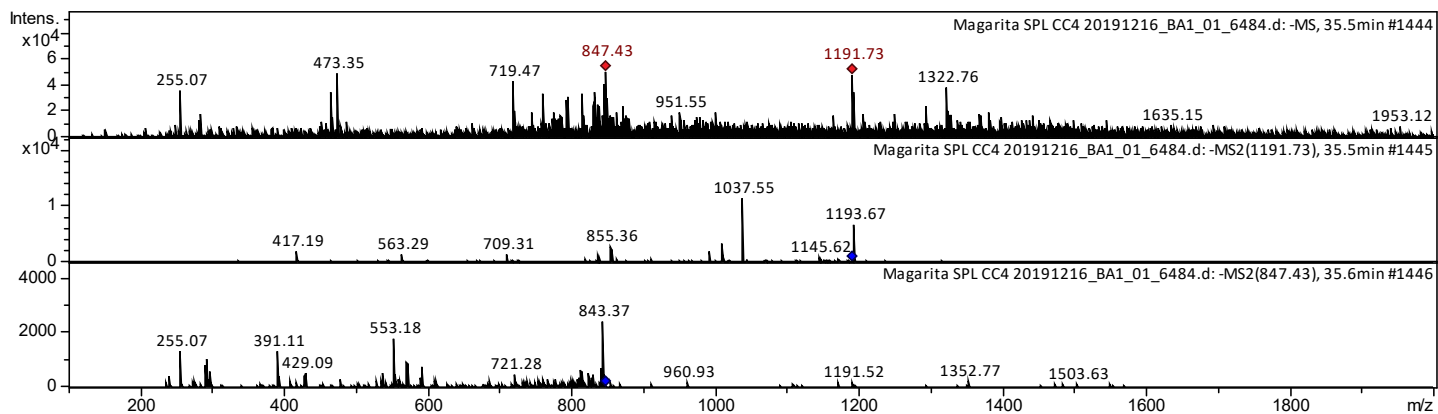

**Figure S13:** LC-ESI-MS/MS of resin glycoside  $m/z$  1191  $[M-H]^-$  from CC4 at 35.5 min.



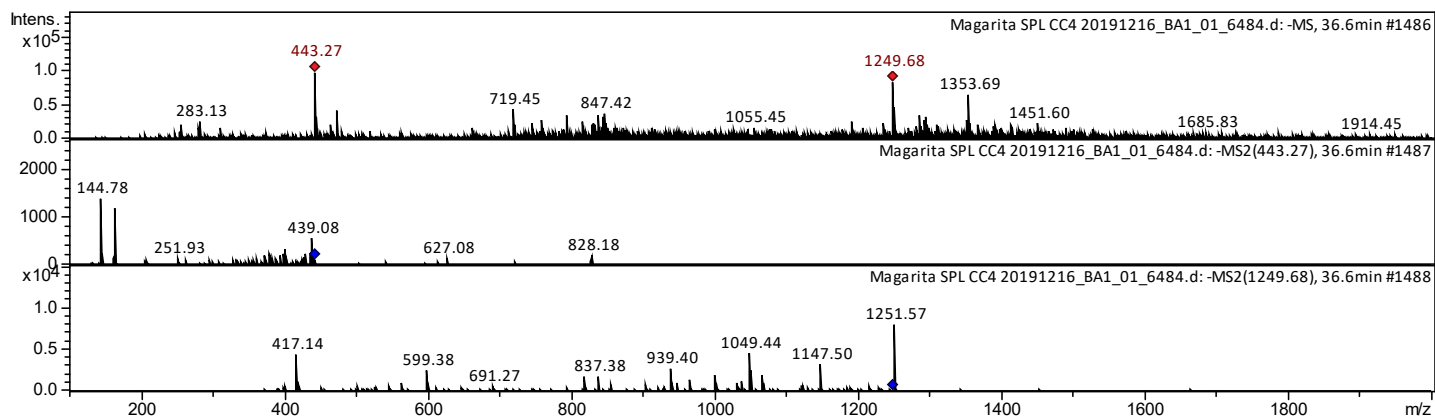

**Figure S14:** LC-ESI-MS/MS of resin glycoside  $m/z$  1249  $[M-H]^-$  from CC4 at 36.6 min.

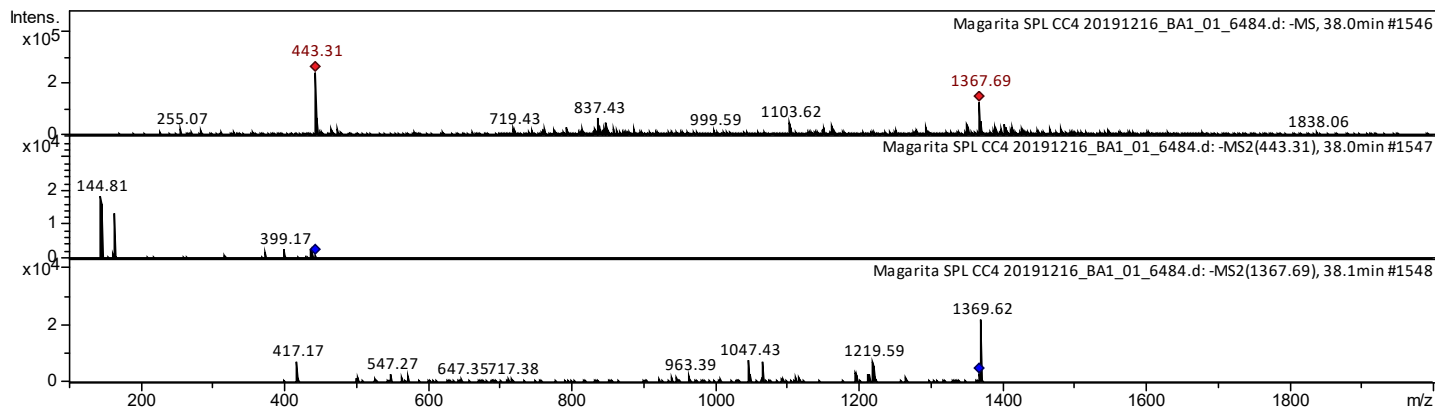

**Figure S15:** LC-ESI-MS/MS of resin glycoside  $m/z$  1367  $[M-H]^-$  from CC4 at 38.0 min.

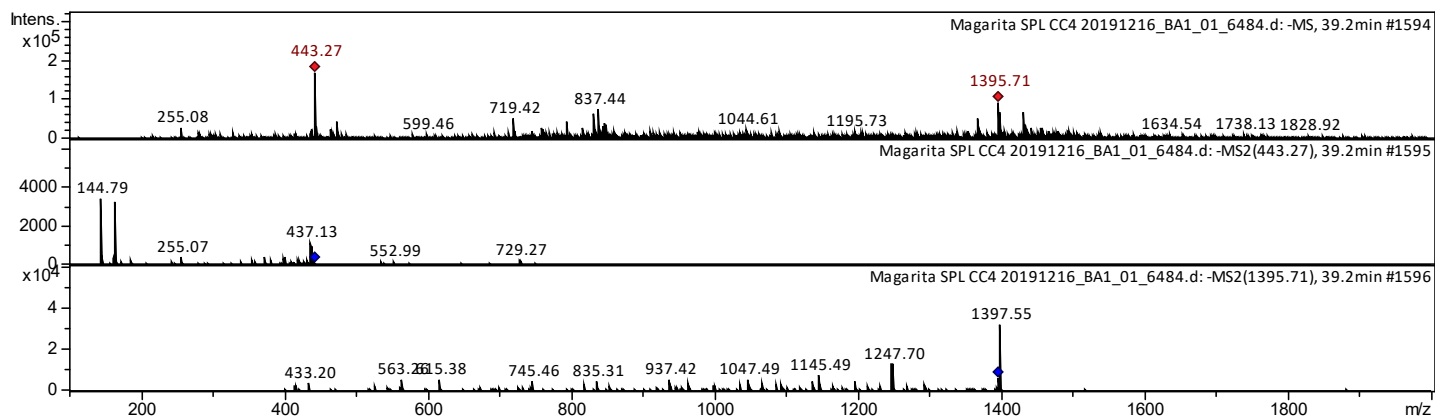

**Figure S16:** LC-ESI-MS/MS of resin glycoside  $m/z$  1395  $[M-H]^-$  from CC4 at 39.2 min.

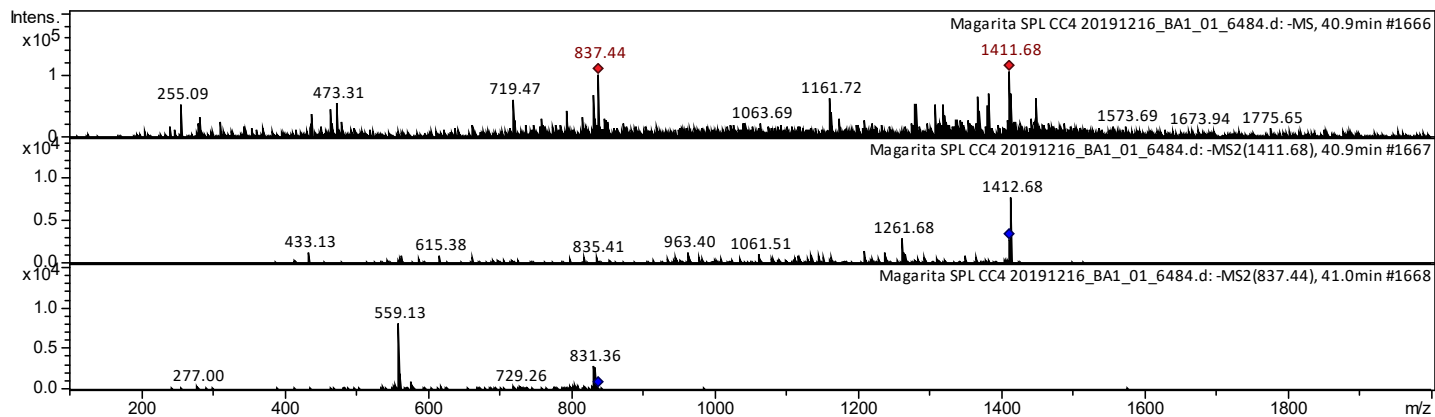

**Figure S17:** LC-ESI-MS/MS of resin glycoside  $m/z$  1411  $[M-H]^-$  from CC4 at 40.9 min.

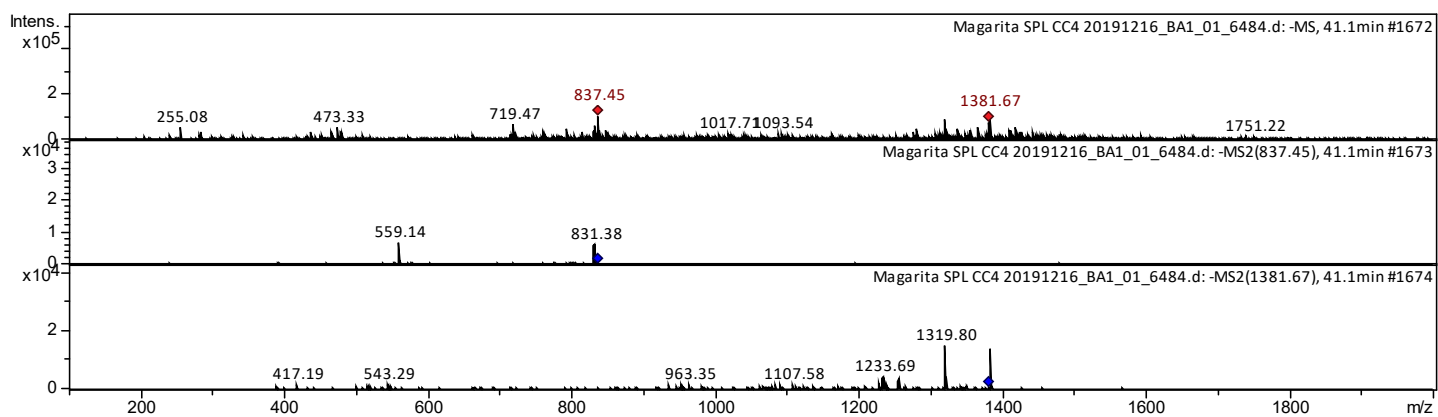

**Figure S18:** LC-ESI-MS/MS of resin glycoside  $m/z$  1381  $[M-H]^-$  from CC4 at 41.1 min.

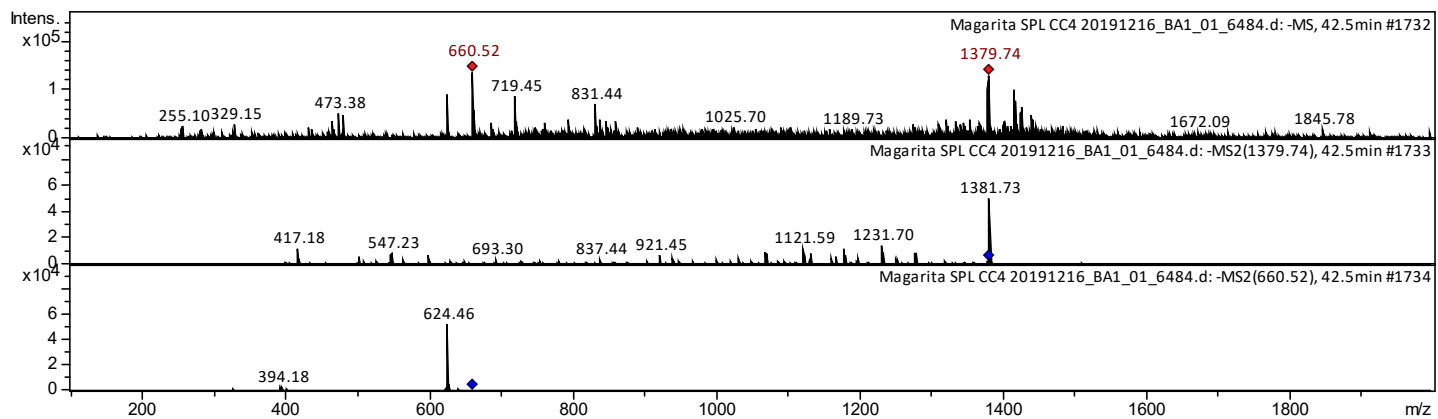

**Figure S19:** LC-ESI-MS/MS of resin glycoside  $m/z$  1379  $[M-H]^-$  from CC4 at 42.5 min.

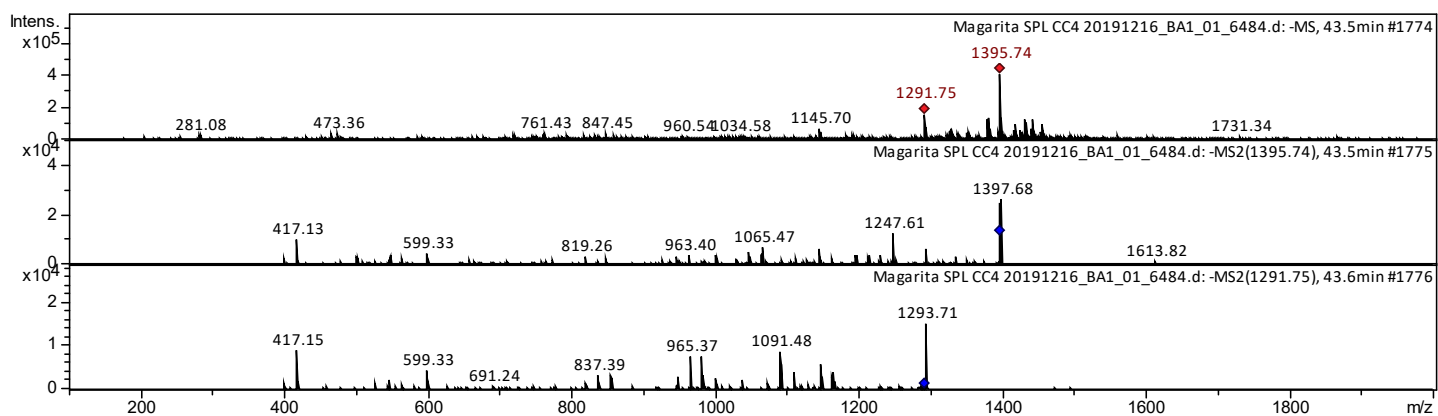

**Figure S20:** LC-ESI-MS/MS of resin glycoside  $m/z$  1291  $[M-H]^-$  from CC4 at 43.6 min.

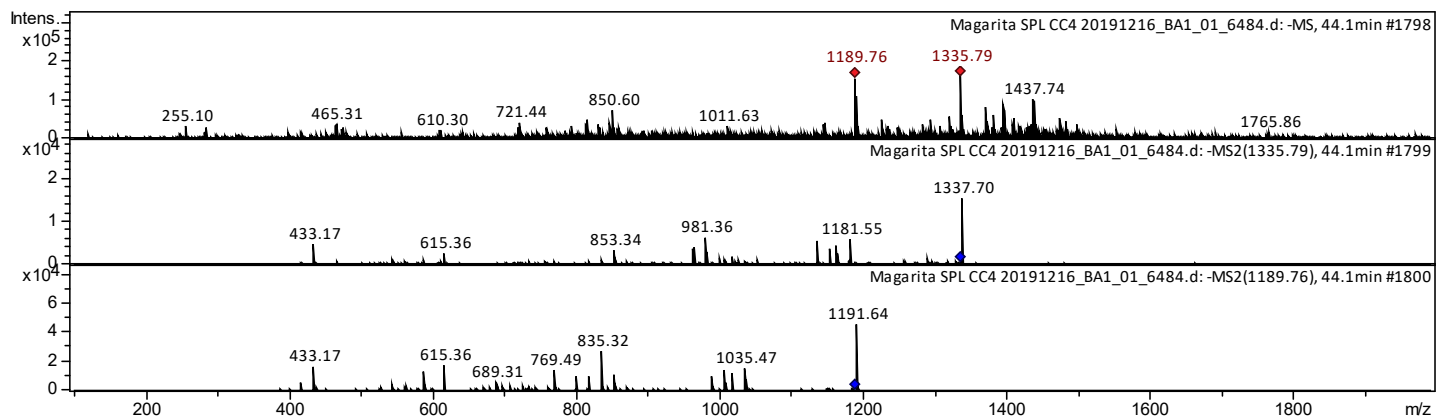

**Figure S21:** LC-ESI-MS/MS of resin glycoside  $m/z$  1335  $[M-H]^-$  from CC4 at 44.1 min.

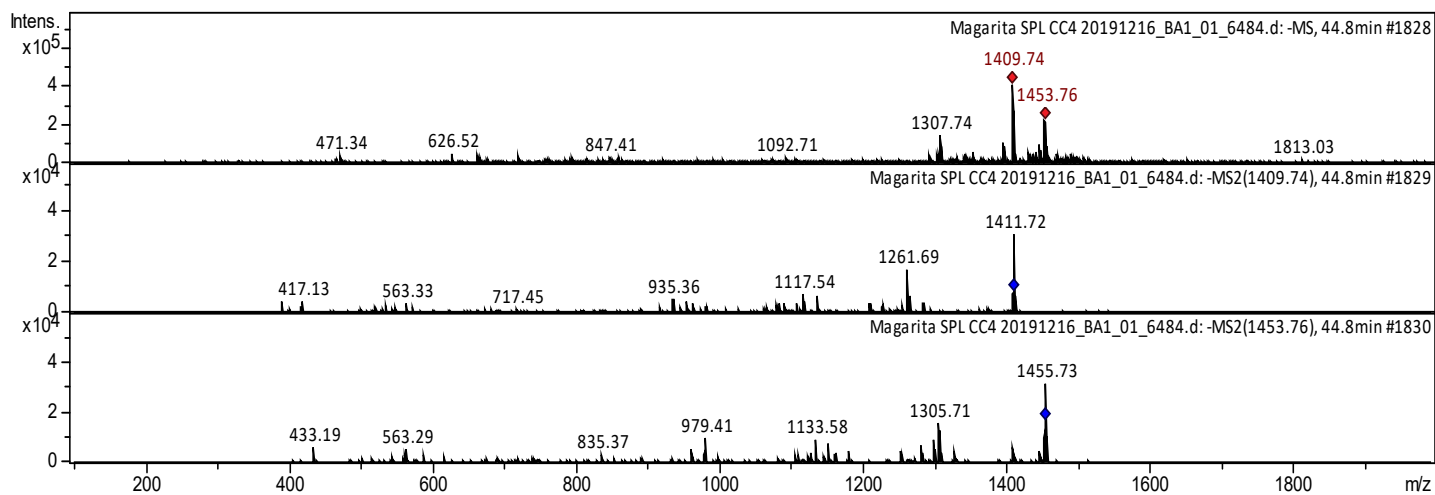

**Figure S22:** LC-ESI-MS/MS of resin glycoside  $m/z$  1409  $[M-H]^-$  and  $m/z$  1453  $[M-H]^-$  from CC4 at 44.8 min.

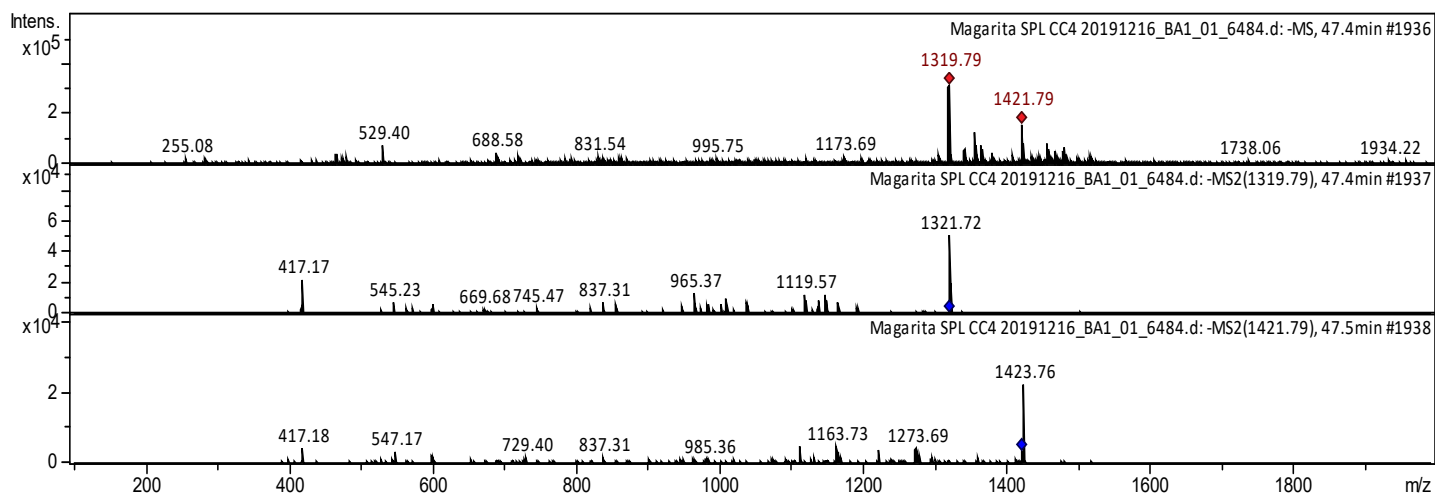

**Figure S23:** LC-ESI-MS/MS of resin glycoside  $m/z$  1319  $[M-H]^-$  from CC4 at 47.4 min.

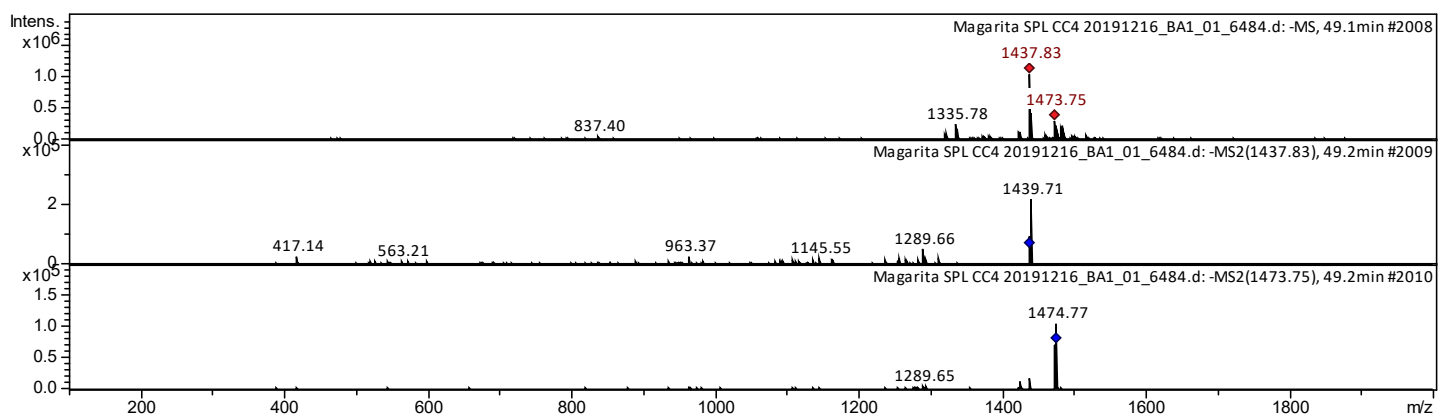

**Figure S24:** LC-ESI-MS/MS of resin glycoside  $m/z$  1437  $[M-H]^-$  from CC4 at 49.2 min.

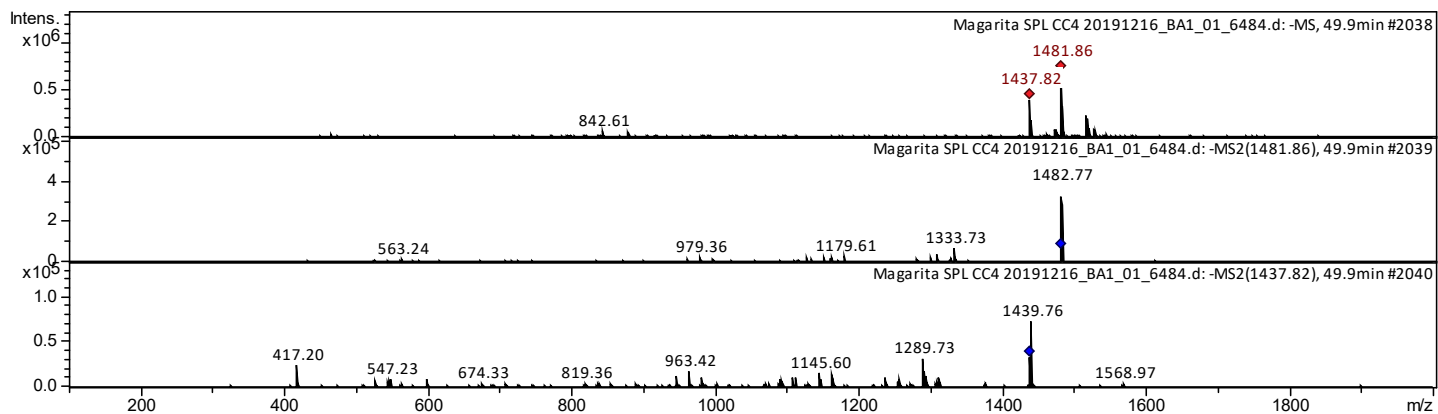

**Figure S25:** LC-ESI-MS/MS of resin glycoside  $m/z$  1437  $[M-H]^-$  from CC4 at 49.9 min.

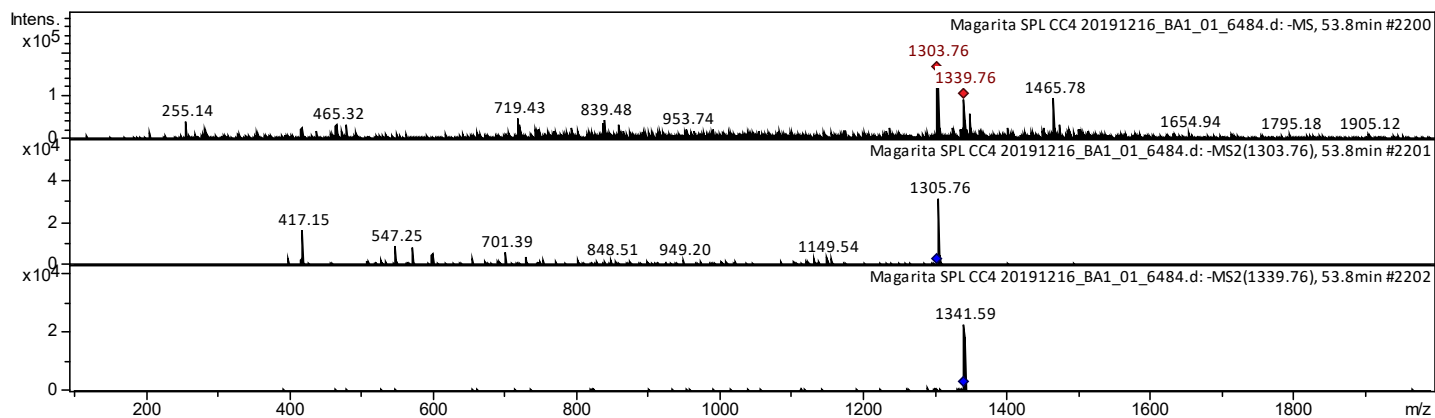

**Figure S26:** LC-ESI-MS/MS of resin glycoside  $m/z$  1303  $[M-H]^-$  from CC4 at 53.8 min.

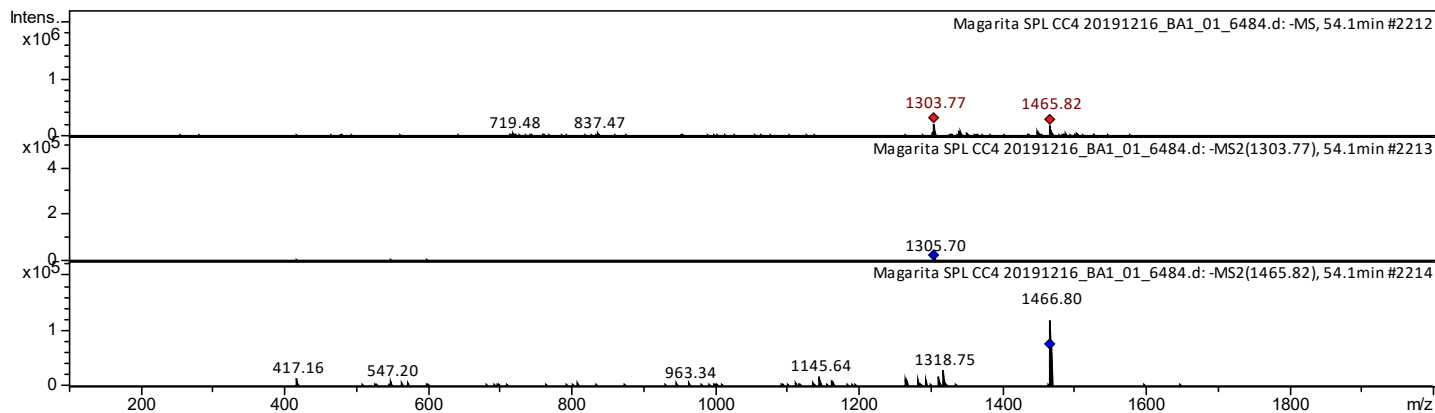

**Figure S27:** LC-ESI-MS/MS of resin glycoside  $m/z$  1465  $[M-H]^-$  from CC4 at 54.1 min.

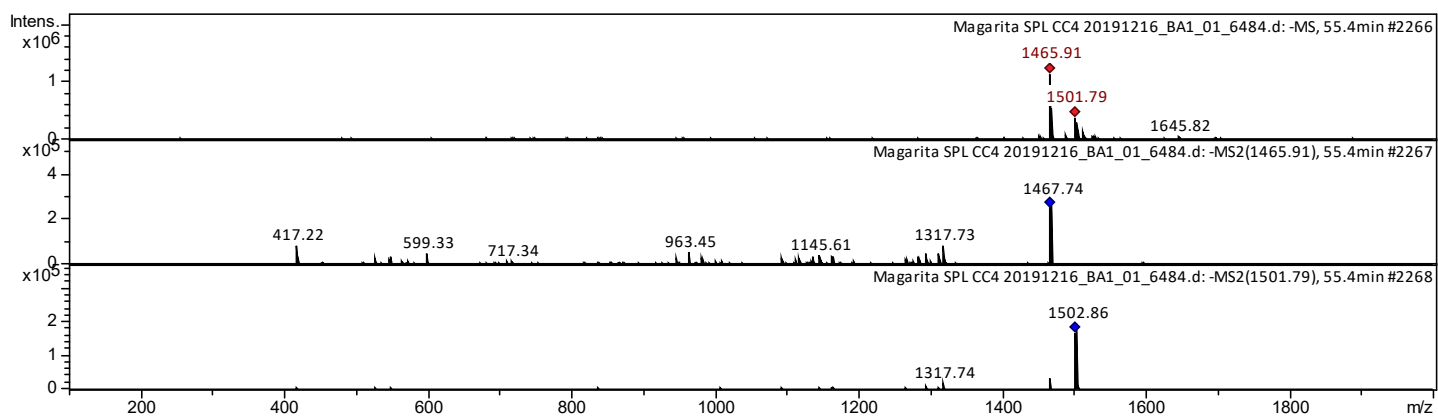

**Figure S28:** LC-ESI-MS/MS of resin glycoside  $m/z$  1465  $[M-H]^-$  from CC4 at 55.4 min.
